# Supplementary material
Source: publisher site journal article supplement (http://e-cmh.org/upload/media/cmh-2022-0040-suppl1.pdf)
Supplement: Supplementary file 1 [file cmh-2022-0040-suppl1.pdf]

**Supplementary Table 1.** Patients' characteristics of all subjects

|                                                                   | Value                               | Range     |
|-------------------------------------------------------------------|-------------------------------------|-----------|
| Total number of patients                                          | 65                                  | N/A       |
| Age (years)                                                       | 46.0 (40.0–54.5)                    | 20.0–89.0 |
| Sex, female/male (%)                                              | 24.6/75.4 (16–49)                   | N/A       |
| Body mass index (kg/m <sup>2</sup> )                              | 26.3 (23.7–29.9)                    | 19.9–44.6 |
| Subtype of psoriasis, PV/PsA/PE/PuP (%)                           | 64.6/24.6/6.2/4.6 (42/16/4/3)       | N/A       |
| Duration after the diagnosis of psoriasis (years)                 | 12 (5–20)                           | 0.5–43    |
| PASI                                                              | 8.7 (4.6–16.4)                      | 1.2–33.8  |
| PASI, <5/5–9/≥10 (%)                                              | 26.1/27.7/46.2 (17/18/30)           | N/A       |
| Experience of biological medication, biologic naïve/switching (%) | 21.5/78.5 (14/51)                   | N/A       |
| IL-17 inhibitor, secukinumab/ixekizumab (%)                       | 64.6/35.4 (42/23)                   | N/A       |
| Alcoholic intake, 0/1–19/20–59/>60 g/day/no data (%)              | 40.0/4.6/3.1/1.5/50.8 (26/3/2/1/33) | N/A       |
| Obesity, presence/absence (%)                                     | 66.2/33.8 (43/22)                   | N/A       |
| Diabetes mellitus, presence/absence (%)                           | 23.1/76.9 (15/50)                   | N/A       |
| Hypertension, presence/absence (%)                                | 30.8/69.2 (20/45)                   | N/A       |
| Dyslipidemia, presence/absence (%)                                | 13.8/86.2 (9/56)                    | N/A       |

Values are presented as median (interquartile range), range (minimum-maximum), or number.

N/A, not applicable; PV, psoriasis vulgaris; PsA, psoriatic arthritis; PE, psoriatic erythroderma; PuP, pustular psoriasis; PASI, psoriasis area and severity index; IL-17, interleukin-17.
